# Supplementary material
Source: PubMed Central journal article supplement (PMC2634868)
Supplement: 0809761106_0809761106SI.pdf [file 0809761106_0809761106SI.pdf]

# Supporting Information

Cheng *et al.* 10.1073/pnas.08097611106

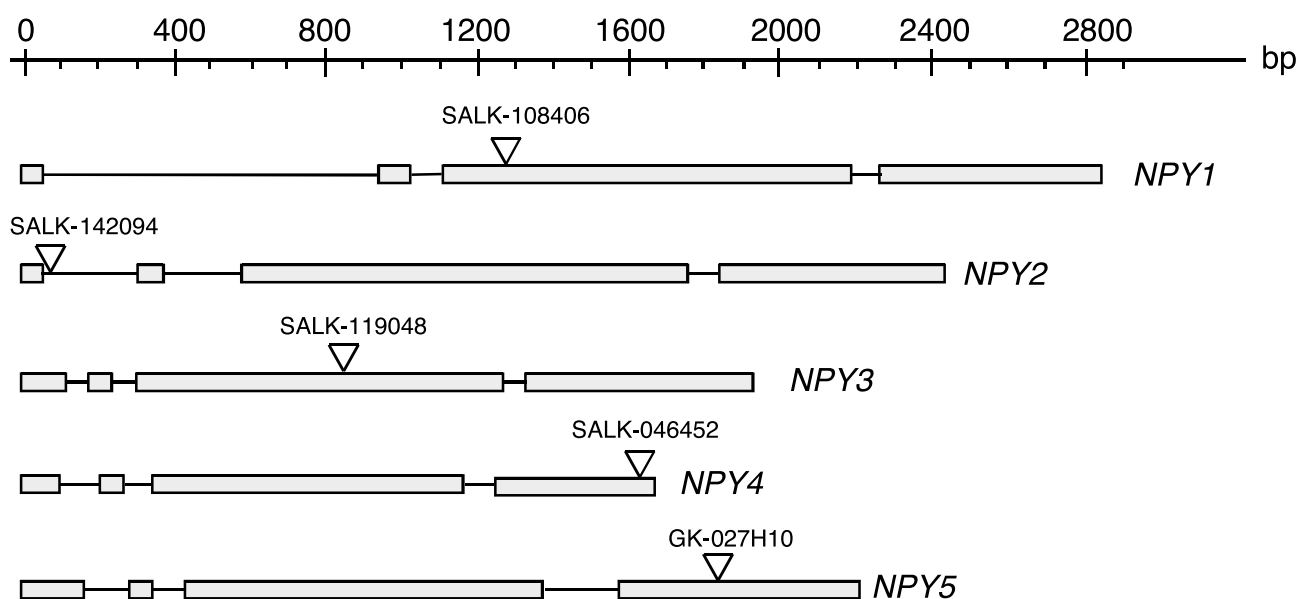

**Fig. S1.** T-DNA insertions in the *npy* mutants. The rectangular bars represent exons, and straight lines represent introns. The insertion sites are marked with a triangle. The exact insertion sites are described in the text.

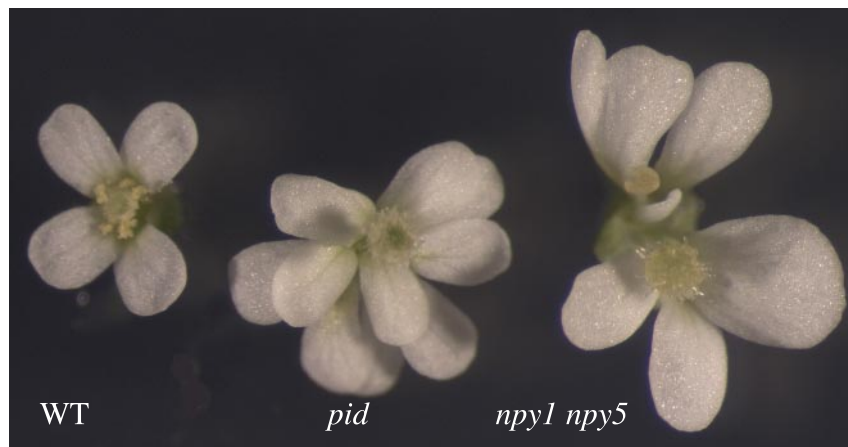

| Flowers        | <i>npy1npy5</i> flower |            |            | <i>pid</i> flower |             |          |
|----------------|------------------------|------------|------------|-------------------|-------------|----------|
|                | Sepal                  | Petal      | Stamen     | Sepal             | Petal       | Stamen   |
| 1              | 3                      | 7          | 1          | 3                 | 7           | 1        |
| 2              | 3                      | 7          | 2          | 3                 | 8           | 3        |
| 3              | 4                      | 5          | 2          | 2                 | 8           | 0        |
| 4              | 3                      | 5          | 2          | 3                 | 8           | 2        |
| 4              | 3                      | 5          | 1          | 4                 | 7           | 0        |
| 6              | 3                      | 6          | 0          | 2                 | 6           | 1        |
| 7              | 1                      | 5          | 2          | 3                 | 7           | 0        |
| 8              | 3                      | 5          | 2          | 5                 | 7           | 3        |
| 9              | 4                      | 5          | 0          | 1                 | 7           | 1        |
| 10             | 3                      | 6          | 3          | 4                 | 8           | 2        |
| 11             | 3                      | 5          | 2          | 2                 | 8           | 1        |
| 12             | 4                      | 6          | 3          | 2                 | 8           | 1        |
| 13             | 3                      | 4          | 3          | 2                 | 8           | 1        |
| 14             | 2                      | 6          | 3          | 2                 | 7           | 0        |
| 15             | 4                      | 6          | 1          | 1                 | 9           | 0        |
| 16             | 3                      | 5          | 1          | 3                 | 6           | 1        |
| 17             | 3                      | 5          | 2          | 2                 | 8           | 1        |
| 18             | 4                      | 5          | 3          | 2                 | 7           | 1        |
| 19             | 3                      | 4          | 3          | 3                 | 7           | 0        |
| 20             | 3                      | 4          | 2          | 1                 | 8           | 1        |
| <b>Average</b> | <b>3.1</b>             | <b>5.3</b> | <b>1.9</b> | <b>2.5</b>        | <b>7.45</b> | <b>1</b> |

**Fig. S2.** Flower defects in *npy1 npy5* double mutants. (Upper) (Left) Wild-type *Arabidopsis* flowers usually have four sepals, four petals, and six stamens. (Center and Right) Both *pid* (Center) and *npy1 npy5* (Right) had more petals. (Lower) Quantitative analyses of the floral organ numbers are detailed.

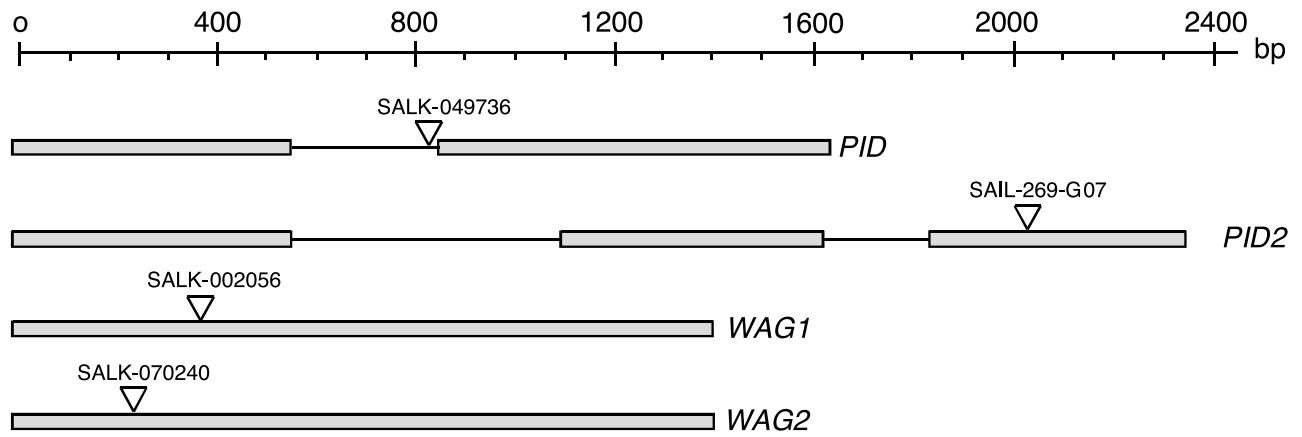

**Fig. S3.** Schematic presentation of the T-DNA insertions in the mutants of *pid* and its homologs. Rectangular bars represent exons, and straight lines represent introns. The insertion sites are marked with a triangle. The exact insertion sites are described in the text.

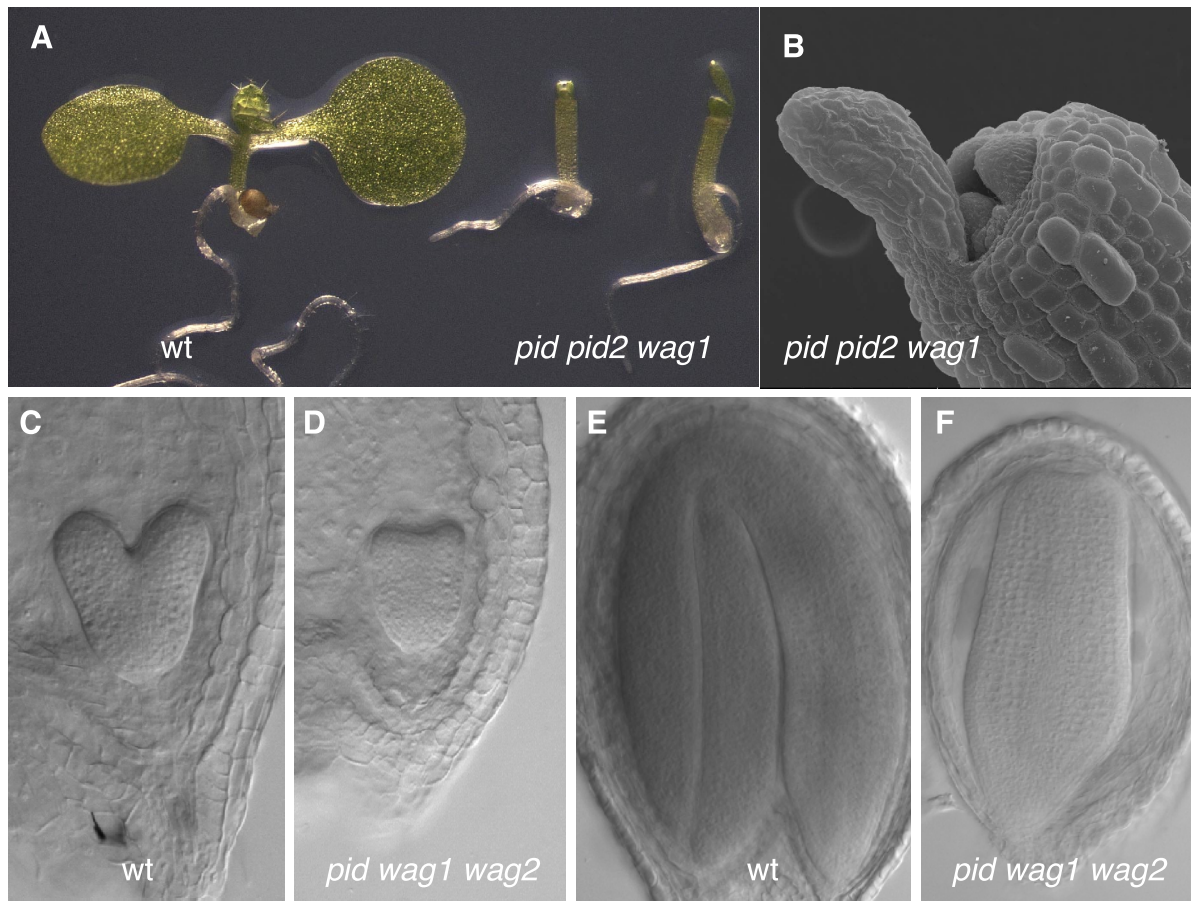

**Fig. 54.** Analysis of cotyledon defects in mutants in which *PID* and some of its homologs were disrupted. (A) Cotyledon defects in *pid pid2 wag1*. A small percentage of *pid pid2 wag1* did not make cotyledons or only had residual cotyledons. (B) A SEM graph shows a residual cotyledon. (C) A wild-type heart-stage embryo. (D) A heart-stage embryo of *pid wag1 wag2*. (E) A mature wild-type embryo. Cotyledons were obvious. (F) A mature embryo of *pid wag1 wag2*. No cotyledons were formed.

**Table S1. Genotyping primers for mutations in members of the *NPY* and *PID* families**

| Primer  | Primer sequence                 |
|---------|---------------------------------|
| NPY1-LP | 5'-CCTCTGGATATTCTAAACTAGGC-3'   |
| NPY1-RP | 5'- CAAACTCCTTGTACCGGTCATC-3'   |
| NPY2-LP | 5'-GCTGTGTATCGCCGTGGTTAC-3'     |
| NPY2-RP | 5'-CATCTCGAGCCTTGATTGAATCC-3'   |
| NPY3-RP | 5'-GAGATCACCCACATTTGCTTCC-3'    |
| NPY3-LP | 5'-ATGAAGTTTATGAAACTTGGATCC-3'  |
| NPY4-LP | 5'-CCTCTAGCTTCTTGACCAAGCTAC-3'  |
| NPY4-RP | 5'-GTGATGGTCTGTTGGTGATTGG-3'    |
| NPY5-LP | 5'-CTAATGCTTCTTGCTTGTGGAAG-3'   |
| NPY5-RP | 5'-CCTGATGAGAAACGTAGCGTTTC-3'   |
| PID2-LP | 5'-CGCAGCAGAAACTCTAGTGG-3'      |
| PID2-RP | 5'-CGTCCATAATAATCACATGGACCTC-3' |
| WAG1-LP | 5'-ATGGAAGACGACGGTTATTACC-3'    |
| WAG1-RP | 5'-GGAGAAACAACCGCCACCACG-3'     |
| WAG2-LP | 5'-CTCCGAGCAACGGAGAAGCAAC-3'    |
| WAG2-RP | 5'-GAACTCTTGCTCAAAGACACAC-3'    |
